# Supplementary material
Source: MDPI journal article supplement (https://www.mdpi.com/2077-0472/10/8/350)
Supplement: s1 [file s1]

(a) 2012DS Victoria

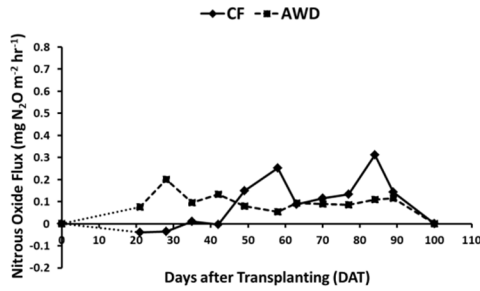

(b) 2013DS Victoria

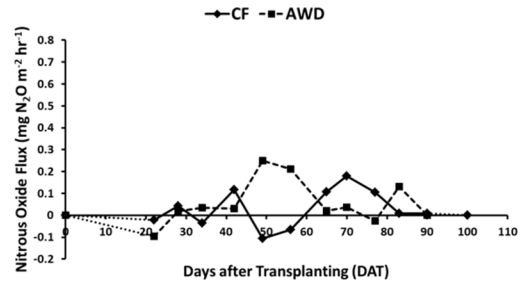

(c) 2013WS Victoria

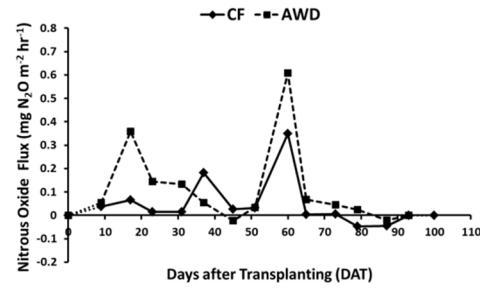

(d) 2014DS Anao

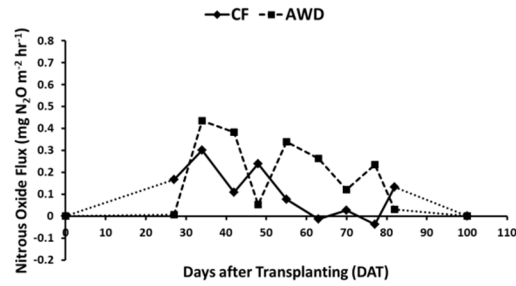

(e) 2014WS Anao

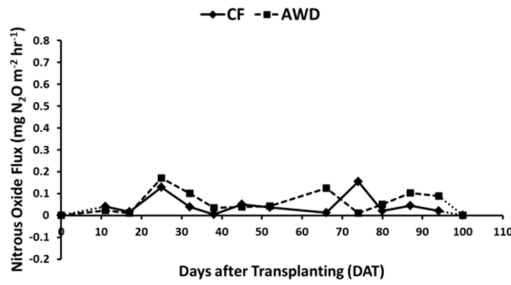

(f) 2015DS Anao

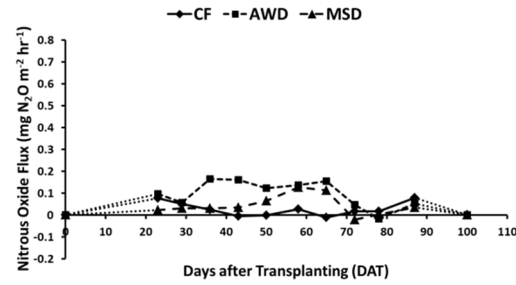

(g) 2015WS Anao

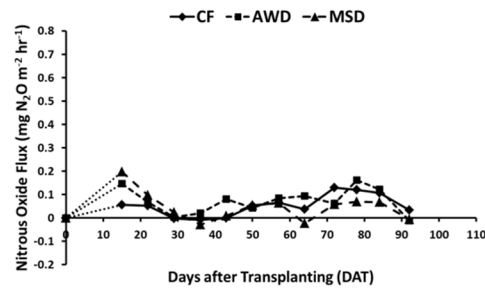

**Figure S1. (a-g)** Seasonal variations of N<sub>2</sub>O flux in Victoria, Tarlac farmers' fields for 2012 DS (a), 2013 DS (b), and 2013 WS (c) and in Anao, Tarlac farmers' fields for 2014 DS (d), 2014 WS (e), 2015 DS (f), and 2015 WS (g) as affected by different water management treatments. Values represent arithmetic means of 3 replicate fields with 3 replicate chambers each. Dotted lines at the beginning and at the end of each season indicate extrapolation of emissions to the transplanting and harvest dates, respectively, when emissions are assumed to be "0".
